## Risk assessment and prognostic factors for mould-related diseases in immunocompromised patients

Livio Pagano<sup>1\*</sup>, Murat Akova<sup>2</sup>, George Dimopoulos<sup>3</sup>, Raoul Herbrecht<sup>4</sup>, Lubos Drgona<sup>5</sup> and Nicole Blijlevens<sup>6</sup>

<sup>1</sup>Department of Hematology, Università Cattolica del Sacro Cuore, Largo Francesco Vito 1, I-00168 Rome, Italy; <sup>2</sup>Section of Infectious Diseases, Hacettepe University, Ankara, Turkey; <sup>3</sup>Department of Intensive Care, Attikon University, Athens, Greece; <sup>4</sup>Department of Oncology and Hematology, Hôpital de Hautepierre, Strasbourg, France; <sup>5</sup>Comenius University and National Cancer Institute, Bratislava, Slovakia; <sup>6</sup>Department of Haematology, Radboud University Medical Centre, Nijmegen, The Netherlands

\*Corresponding author. Tel: +39-0630-154180; Fax: +39-0630-51343; E-mail: lpagano@rm.unicatt.it

Invasive fungal diseases are important causes of morbidity and mortality in immunocompromised patients. Patients with haematological malignancies and solid cancers, as well as those with allogeneic haematopoietic stem cell and solid organ transplants, are at high risk of developing such an infection. Many fungi can cause invasive disease, with *Aspergillus* spp. and *Candida* spp. being the prevalent fungal pathogens infecting susceptible patients. During the past few years, rare moulds (for example Zygomycetes and *Fusarium* spp.) have come into focus as the cause of devastating clinical disease. This review aims to analyse environmental factors and parameters related to impairment of the immune system that are thought to favour the onset of invasive mould infections. Some moulds are quite common among all categories of patients, while others appear to be limited to a given subset of patients, such as allogeneic haematopoietic stem cell or solid organ transplant recipients. In addition to an exploration of factors that predispose patients to the acquisition of an invasive mould infection, prognostic factors that help to predict the eventual outcome of these infections are identified.

**Keywords:** moulds, immune system, environment, risk factors, prognostic factors

### Introduction

Fungi are opportunistic pathogens that can cause infections that evolve into invasive disease in critically ill patients as a result of the concurrence of multiple predisposing factors. An impaired immune system and exposure to filaments or spores in the environment are the most important factors. Until a few years ago, *Candida* spp. were held responsible for the majority of fungal infections, but over time a shift in the prevalent pathogens has been observed. At present, the majority of invasive fungal diseases (IFDs) in severely immunocompromised patients are attributed to moulds.<sup>1–3</sup>

Many different fungi, including *Aspergillus* spp., Zygomycetes, *Fusarium* spp., *Scedosporium* spp. and *Acremonium* spp., have been associated with invasive mould diseases (IMDs), with invasive aspergillosis (IA) being the predominant infection.

Various studies involving large numbers of patients have identified categories of patients who are at high risk of IA and other IMDs, namely patients undergoing treatment for haematological malignancies, notably acute myeloid leukaemia (AML), and those who have undergone allogeneic haematopoietic stem cell transplantation (HSCT); those who have received a solid organ transplant (SOT); and a variety of patients with other severe immunosuppressive conditions.<sup>2–11</sup> Table 1

summarizes the risk level for each category of immunocompromised patients at risk of IMD.

### Risk factors

#### Genetic risk factors

In recent years it has been hypothesized that genetic variation within key innate or adaptive immune response genes may influence susceptibility to, as well as the outcome of, IFD.<sup>12</sup> Indeed, recent studies have demonstrated the possibility of a genetic predisposition to the onset of IFD when immune defences fail [for example, interleukin-10 (IL-10) production, Toll-like receptor (TLR) polymorphism and polymorphism in the plasminogen gene].<sup>12–18</sup>

The production of IL-10, a cytokine that exerts regulatory activity in the inflammatory response, and that of tumour necrosis factor- $\alpha$  (TNF- $\alpha$ ) has a role in the development of IA. It has been shown that patients with the ACC haplotype, which is associated with decreased IL-10 production, have a 9-fold lower risk of developing IA compared with control patients who have unaffected IL-10 production. Conversely, among those with the ATA haplotype (associated with increased IL-10 production) a significantly higher incidence of IA has been

**Table 1.** Stratification of immunocompromised patients in risk categories for invasive fungal disease according to incidence and mortality rates obtained from current literature<sup>2-7,9-11</sup>

| Low risk                                                       | Intermediate risk             | High risk                                              |
|----------------------------------------------------------------|-------------------------------|--------------------------------------------------------|
| autologous HSCT                                                | acute lymphoblastic leukaemia | acute myeloid leukaemia (above all in first induction) |
| Hodgkin's lymphoma                                             | chronic lymphocytic leukaemia | allogeneic HSCT (particularly with cord blood source)  |
| chronic myeloproliferative disorders<br>(CML and Ph- diseases) | lymphoma                      | heart, lung, liver transplantation                     |
| solid cancer                                                   | COPD                          |                                                        |
| myeloma                                                        | AIDS                          |                                                        |
| kidney transplantation                                         | myelodysplastic syndromes     |                                                        |
| chronic immunological disease                                  |                               |                                                        |
| systemic lupus erythematosus                                   |                               |                                                        |

CML, chronic myeloid leukaemia; COPD, chronic obstructive pulmonary disease; Ph-, Philadelphia negative.

noted.<sup>13</sup> TNF- $\alpha$  production is considered to be genetically determined in >60%–70% of cases; this factor may explain, at least in part, the interindividual differences in the risk of acquiring IFD in patients who undergo equally immunosuppressive treatment regimens.<sup>14</sup>

TLRs are transmembrane proteins expressed on the surface of immune cells, and they interact with several adaptor proteins to activate transcription factors, resulting in the production of inflammatory cytokines and the activation of adaptive immunity. Various polymorphisms in TLRs are thought to be allied to an increased risk of IFD. Meticulous attention has been paid to polymorphisms of TLR2 and TLR4 (gene haplotype S4). The absence or weakness of the signal in epithelial cells, not activated by TLR2 and TLR4 that are genetically abnormal, can lead to an increased risk of acquiring IA.<sup>14,15</sup>

Similar observations have been reported in the presence of polymorphisms in TLR1 and TLR6.<sup>16</sup> Other genetic factors that have been linked with increased susceptibility to IA are polymorphisms in the plasminogen gene and the mannose-binding lectin gene.<sup>17,18</sup>

### Risk factors related to the environment

*Aspergillus* spp., Zygomycetes and other moulds are ubiquitous saprophytes present in air, soil and water; therefore, exposure to these agents is almost universal. The primary mode of acquiring a mould infection is inhalation of fungal spores. After inhalation, spores are deposited in the mucous membranes of the upper and lower respiratory tract, and this may lead to pulmonary or sinus infection in extremely susceptible immunocompromised patients. Sources of potentially pathogenic fungi can be found both outside and inside the hospital walls. The epidemiology of mould infections, especially IA, that originate from the environment is influenced by meteorological conditions, which vary in regions of endemicity. Data from surveys indicate a high incidence of IA just after seasonal periods of dry weather with high temperatures (summer and autumn).<sup>19,20</sup> In addition to the weather conditions, other predisposing factors, such as personal habits or lifestyle, have to be taken into account because a substantial number of patients who are diagnosed with haematological malignancy are already colonized at the time of the first clinical manifestation of their underlying

disease. Patients suffering from AML who smoke cigarettes ( $P<0.05$ ), live in the countryside ( $P<0.05$ ) or have been exposed to high concentrations of fungal spores ( $P<0.05$ ) have been found to be at increased risk of developing IFD.<sup>21</sup> Likewise, farmers who inhale large quantities of mycotoxins, endotoxins and other toxic chemicals from contaminated silage have an increased risk of developing pulmonary mycotoxicosis.<sup>22</sup> In consequence, such colonized patients are prone to developing IA when immune defences become deficient as a result of the treatment of the underlying haematological malignancy or subsequent immunosuppressive therapy. In the majority of environment-related cases, IFD constitutes a nosocomial infection. A recent review of 60 outbreaks of IA demonstrated that most resulted from contamination of the air due to building activities in the hospital.<sup>23</sup> Even reconstruction at sites remote from the patient's accommodation may increase the risk of infection. Malfunction or contamination of hospital ventilation systems without high-efficiency particulate air filters has also been reported as a cause of infection.<sup>24,25</sup> Other possible sources of spores include potted plants, flowers and carpets, as well as water supplies, because spores present in the water are released during showering (Table 2).<sup>26,27</sup>

Recent studies demonstrated also that dectin-1 deficiency is a novel susceptibility factor for aspergillosis in high-risk patients and identifies a previously unsuspected role for dectin-1 in anti-fungal immunity.<sup>28</sup>

### Risk factors related to the immune system

Neutropenia and impaired cell-mediated immunity are the most prominent defects in the immune system that predispose individuals to mould infections. The role of neutrophils in the control of fungal infections is fundamental. These cells are essential in the initiation and execution of the acute inflammatory response and subsequent resolution of infiltrates caused by the fungal infection. Usually neutrophils, together with monocytes/macrophages, internalize resting or swollen conidia, and use mechanisms such as respiratory burst to combat the growth of fungal elements in the body. A generally accepted tenet that also applies to IFD is that the longer and the deeper the neutropenia, the higher the incidence of serious infections. In 1966, Bodey<sup>29</sup> demonstrated that the frequency of infections

**Table 2.** Environmental risk factors

| Risk factor                             | Reference(s) |
|-----------------------------------------|--------------|
| Seasonal incidence                      | 18,19        |
| Weather variation                       | 18,19        |
| temperature                             | 18,19        |
| rainfall                                | 18,19        |
| humidity                                | 18           |
| wind speed                              | 18           |
| Personal habits                         | 20,21        |
| smoking                                 | 20           |
| living in countryside                   | 20           |
| fungus exposure                         | 20           |
| type of work (e.g. farmer, agriculture) | 21           |
| Exposure outside                        | 20–22        |
| pets                                    |              |
| dusty household                         | 20           |
| construction work                       |              |
| Exposure inside                         | 22–26        |
| potted plants                           | 25           |
| absence of HEPA-filtered rooms          | 22,23        |
| water                                   | 26           |

HEPA, high-efficiency particulate air.

in patients with acute leukaemia was related to the levels of circulating leucocytes, more specifically neutrophils, and that the prevalence of all types of infection was inversely related to the level of neutrophils. The most important factor in predicting the risk of infection was actually the duration of neutropenia. If neutropenia persisted for 3 weeks, the risk of developing an infection, including those caused by fungi, was 60%, with a further rise to 100% when the neutrophil count dropped to levels of  $<0.10 \times 10^9/L$ . However, not only is the incidence of infections related to neutrophil count, but the outcome of bacterial and fungal infections also appears to be dependent on the evolution of the neutrophil count, with the highest fatality rate among patients with long-standing severe neutropenia ( $<0.10 \times 10^9/L$ ). Recent studies have corroborated these classic observations.<sup>30</sup>

The most common causes of neutropenia are cytotoxic or radiation therapy for a malignancy, but it may also be associated with autoimmune diseases, HIV infection, myelodysplastic syndromes, aplastic anaemia and drug-related bone marrow toxicity. In particular, patients affected by AML are considered to be at the highest risk. These patients develop neutropenia as a result of invasion of their bone marrow by leukaemic cells, as well as through the use of myeloablative cytotoxic therapy. Not only do patients with AML have a reduced number of neutrophils, but the function of the few remaining cells is usually debilitated, often due to a possibly coexisting myelodysplasia. A recent study has revealed that, in comparison with normal controls, dysplastic neutrophils display a lower fungicidal activity against yeasts and, presumably, moulds.<sup>31</sup>

It has become clear that it is not only neutropenia that must be seen as a factor that predisposes to IFD: lymphocytopenia

occurring after an allogeneic transplant procedure is another pertinent risk factor.<sup>32</sup>

Drugs used to treat the underlying disease or its complications enhance the risk of IFD in immunocompromised patients. For example, steroids are a well-known major risk factor for the development of IFD. They suppress the ability of monocytes/macrophages to kill conidia through inhibition of non-oxidative processes and impairment of lysosomal activity.<sup>33</sup> Moreover, steroids inhibit polymorphonuclear cells in their chemotaxis, oxidative bursts and activity against hyphae. This may be an important trigger for the emergence of clinically relevant IA. For example, *in vitro* in the presence of hydrocortisone, *Aspergillus fumigatus* has an increased doubling time of 48 min.<sup>34</sup> Generally, steroids suppress macrophages, whereas cytotoxic chemotherapy decreases neutrophil numbers as well as their function. Furthermore, recent studies have shown that not only are the dose levels used important, but so is the duration of treatment.<sup>35</sup> Treatment regimens that involve new anti-neoplastic or immunosuppressive agents, particularly purine analogues (e.g. fludarabine) and antibodies targeted against T lymphocytes (anti-CD52 monoclonal antibodies, anti-thymocyte globulins, anti-CD3 monoclonal antibodies), are also thought to enhance the risk of IFD. These agents may not only cause a transitory deep neutropenia, but also induce prolonged lymphocytopenia with an inherent long-lasting impairment of cell-mediated immunity.<sup>36,37</sup> Similarly, TNF- $\alpha$  blockade therapy (using anti-TNF monoclonal antibodies, e.g. etanercept) has been associated with the occurrence of IA in allogeneic HSCT recipients as well as in non-haematological patients who suffer from autoimmune diseases, such as rheumatoid arthritis or Crohn's disease.<sup>38</sup>

Recently, the important role of iron overload in the emergence of IFD has been highlighted. Iron overload is seen in heavily transfused patients, such as patients with full-blown AML after a long episode of pre-existing myelodysplasia, or recipients of an allogeneic HSCT in whom erythropoiesis was slow to recover.<sup>39,40</sup> Laboratory investigation has revealed that iron is essential for the growth and virulence of moulds. Moreover, high levels of free iron may enhance mucosal damage and may impair cellular antimicrobial systems. Kontoyiannis *et al.*<sup>39</sup> evaluated the bone marrow iron stores as a marker of iron overload and found a significantly higher proportion of patients with high bone marrow iron stores among the population with IA. Deferoxamine may be used to reduce the iron overload in these patients, but the benefit of this intervention is not obvious. In fact, some Zygomycetes, for instance *Rhizopus* spp., utilize this iron chelator as a siderophore to get access to previously unavailable iron, and subsequently the increased iron uptake by the fungus is linearly correlated with its growth.<sup>41</sup> On the other hand, newer iron chelators, such as deferiprone and deferasirox, do not deliver iron to the fungus, and the use of these drugs in patients with an iron overload has been associated with improved fungicidal activity against Zygomycetes *in vitro*.<sup>42</sup>

Some risk factors are specific to a limited group of patients, such as allogeneic HSCT recipients or those who have undergone SOT. Usually these procedures involve a prolonged period of immunosuppression in order to facilitate engraftment. Unfortunately, the drugs utilized for this purpose, as well as the transplant procedure itself, create circumstances that favour the onset of IFD. It is recognized that the type of transplant is

pivotal. For instance, the incidence of IFD in allogeneic HSCT recipients is very different from that found in patients who have undergone autologous transplantation.<sup>3,43</sup>

The source of stem cells for allogeneic transplantation also has some bearing on the risk of IFD. Patients who are transplanted with stem cells harvested from cord blood are considered to be at higher risk; some authors report an IFD incidence of between 30% and 40% after such transplants.<sup>44,45</sup> It is noteworthy that risk factors do differ depending on the time after a transplant procedure: an early (within the first 30 days of the procedure) and a late (after 100 days) phase can be distinguished. The early phase after an allogeneic HSCT is characterized by a low leucocyte count and a damaged mucosal barrier, and this implies that the main risk factors are neutropenia, lymphocytopenia and mucosal damage that can be aggravated by acute graft-versus-host disease (GvHD). During the late phase, impairment of cellular and humoral immunity usually prevails, supplemented by other risk factors that are related to chronic GvHD, relapsing underlying malignancy, cytomegalovirus infection and administration of steroids or immunosuppressant agents (e.g. sirolimus, ciclosporin and infliximab).<sup>8,32,46–48</sup> Of note, if a patient acquires IA during pre-transplant conventional chemotherapy, the risk of recrudescence when a patient subsequently undergoes HSCT is extremely high.<sup>49</sup> Different risk factors have been identified for SOT patients. In general, the incidence of IFD in these patients is lower than in allogeneic HSCT recipients. IA has been observed mainly in lung and heart transplant recipients.<sup>6,7</sup> In a large series of 153 cases of IA in SOT recipients, Gavaldà et al.<sup>50</sup> classified the use of vascular amines, haemodialysis, more than one episode of bacterial infection and cytomegalovirus infection as risk factors for early IA after renal transplantation. Age over 50 years, relapsing bacterial infections, a relapsed malignancy and chronic graft rejection represent the most prominent risk factors for late IA.

The main immune system factors influencing the onset of IFD in each type of immunocompromised patient are listed in Table 3.

### **Risk factors for moulds other than *Aspergillus***

The factors that promote the onset of mould infections other than those due to *Aspergillus* do not differ from those that are held responsible for the emergence of IA, the most important factor being impairment of the immune system (Table 3).

Zygomycosis is relatively rare but is seen with increasing frequency as the population at risk of IFD continues to grow. Patients who are treated for a haematological malignancy and allogeneic HSCT recipients are highly susceptible to these fungal infections. They represent the third leading cause of invasive fungal infections after *Aspergillus* spp. and *Candida* spp.<sup>2</sup>

Although several medical conditions have been associated with an increased risk of zygomycosis, two major factors clearly stand out, namely qualitative or quantitative defects in the phagocytic cells, and metabolic acidosis. As in all other IFDs, neutropenia represents a prominent risk factor for zygomycosis, while metabolic acidosis, which is frequently observed in ketoacidotic diabetes, constitutes a rather exceptional risk factor. Metabolic acidosis interferes with the ability of transferrin to bind iron, and this leads to high iron levels in tissue. High tissue levels of iron may enhance the growth of Zygomycetes, if they

are present. In addition, high concentrations of iron inhibit neutrophil chemotaxis and reduce their capacity for adhesion to hyphae.<sup>51</sup>

It has been suggested that the use of voriconazole could be a possible risk factor for the inception of zygomycosis, since an increased incidence of this fungal disease has been reported after prophylactic use of this compound, particularly in allogeneic HSCT recipients.<sup>52,53</sup> However, recent prospective randomized studies, comparing prophylaxis with voriconazole and other azoles in a large series of allogeneic HSCT patients, did not show a significant increase in the incidence of zygomycosis.<sup>54</sup>

Regarding fusariosis and scedosporiosis, the risk factors for their emergence are identical to those observed for IA.<sup>55–57</sup> Neutropenia plays the key role in patients with haematological malignancies treated with conventional chemotherapy, while acute and chronic GvHD are the main risk factors in allogeneic HSCT recipients.

### **Risk factors for specific immunocompromised settings**

In an evaluation of the risk factors for IFD in medical intensive care units (ICUs) in which most patients did not have haematological malignancies, chronic obstructive pulmonary disease (COPD) and liver failure were recognized as the main risk parameters. A recent study underlined that, in general, COPD may be an important additional risk factor in immunocompromised patients.<sup>58,59</sup>

Mould infections are uncommon among AIDS patients, and since the introduction of effective antiretroviral treatment they have become even rarer. CD4 lymphocyte counts of <50 cells/mm<sup>3</sup>, neutropenia and steroid treatment are the most important factors to predict the onset of IA.<sup>60</sup>

### **Prognostic factors**

During the past few years, various studies have been performed in an attempt to identify the main prognostic factors that could help to forecast the outcome of mould infections. As is the case for risk factors that determine proneness to the disease, the key role is played by a defect in the immune system (Table 4). As a general rule, formulated on the basis of various studies, it can be stated that allogeneic HSCT recipients, patients not in remission of their malignancy and individuals with an uncontrolled disseminated disease will have the worst outcome if they have to be treated for IA.

In patients with haematological malignancy treated with conventional chemotherapy, the role of neutropenia is clear. Prolonged neutropenia caused by the lack of recovery of granulocytopenia after chemotherapy is strongly correlated with a poor prognosis.<sup>61–63</sup> Usually, the lack of neutrophil recovery is due to progression of underlying malignancy that is unresponsive to chemotherapy. An increasing burden of leukaemic cells in the bone marrow will prohibit a return of normal neutrophils.<sup>61,62</sup> Indeed, it has been reported that progression of underlying malignancy is more indicative than neutrophil recovery as such in the prediction of attributable mortality in patients with IA.<sup>63</sup> Recovery to adequate numbers and normal function of the neutrophils are also extremely important factors for a favourable outcome of IA in allogeneic HSCT recipients.<sup>46,62–66</sup> Like neutrophils, monocytes are components of the cellular defence system; therefore, it is not surprising that in various statistical

**Table 3.** Common risk factors for IFDs observed in the different groups of patients (including aspergillosis, zygomycosis, fusariosis)

|                                  | Neutropenia depth<br>and duration | Monocytopenia | Lymphocytopenia | Steroids | Iron<br>overload | GvHD | CMV<br>infection | Purine analogue or<br>monoclonal antibodies | Renal<br>failure | Advanced<br>age |
|----------------------------------|-----------------------------------|---------------|-----------------|----------|------------------|------|------------------|---------------------------------------------|------------------|-----------------|
| Haematopoietic transplantation   |                                   |               |                 |          |                  |      |                  |                                             |                  |                 |
| allogeneic HSCT                  | +                                 | +             | +               | +        | +                | +    | +                | -/+                                         | +                | +               |
| autologous HSCT                  | -                                 | -             | -               | +        | -                | -    | -                | -/+                                         | -                | -               |
| Solid organ transplantation      |                                   |               |                 |          |                  |      |                  |                                             |                  |                 |
| lung or heart-<br>lung           | -                                 | -             | +               | +        | -                | +    | +                | -                                           | +                | +               |
| small bowel                      | -                                 | -             | +               | +        | -                | +    | +                | -                                           | +                | +               |
| kidney                           | -                                 | -             | +               | +        | -                | +    | +                | -                                           | +                | +               |
| liver                            | -                                 | -             | +               | +        | -                | +    | +                | -                                           | +                | +               |
| heart                            | -                                 | -             | +               | +        | -                | +    | +                | -                                           | +                | +               |
| Haematological malignancy        |                                   |               |                 |          |                  |      |                  |                                             |                  |                 |
| acute myeloid<br>leukaemia       | +                                 | +             | -               | -        | +                | -    | -                | +                                           | -                | +               |
| acute lymphoid<br>leukaemia      | -                                 | -             | +               | +        | +                | -    | -                | -                                           | -                | +               |
| multiple myeloma                 | -                                 | -             | -               | +        | -                | -    | -                | -                                           | -                | +               |
| Non-Hodgkin's<br>lymphoma        | -                                 | -             | -               | +        | -                | -    | -                | +                                           | -                | +               |
| Hodgkin's disease                | -                                 | -             | -               | +        | -                | -    | -                | -                                           | -                | +               |
| chronic myeloid<br>leukaemia     | -                                 | -             | -               | -        | -                | -    | -                | -                                           | -                | +               |
| chronic lymphoid<br>leukaemia    | -                                 | -             | +               | -        | -                | -    | -                | +                                           | -                | +               |
| solid tumour                     | -                                 | -             | -               | -        | -                | -    | -                | -                                           | +                | +               |
| AIDS                             | -                                 | -             | -               | -        | -                | -    | -                | -                                           | -                | -               |
| chronic immunological<br>disease | -                                 | -             | -               | +        | -                | -    | -                | -                                           | -                | -               |

CMV, cytomegalovirus.

**Table 4.** Prognostic factors in the different categories of patients for different IMDs

|                                  | Neutropenia<br>recovery | Monocytopenia | Uncontrolled<br>underlying<br>malignancy | Steroid<br>administration | Probable or<br>proven<br>versus<br>possible IA | Uncontrolled<br>graft-versus-host<br>disease | Disseminated<br>disease<br>(including CNS) | Renal<br>failure | Prior<br>respiratory<br>disease |
|----------------------------------|-------------------------|---------------|------------------------------------------|---------------------------|------------------------------------------------|----------------------------------------------|--------------------------------------------|------------------|---------------------------------|
| Haematopoietic transplantation   |                         |               |                                          |                           |                                                |                                              |                                            |                  |                                 |
| allogeneic HSCT                  | +                       | +             | +                                        | +                         | +                                              | +                                            | +                                          | +                | +                               |
| autologous HSCT                  | +                       | -             | -                                        | -                         | +                                              | -                                            | +                                          | -                | -                               |
| Solid organ transplantation      |                         |               |                                          |                           |                                                |                                              |                                            |                  |                                 |
| lung or heart-<br>lung           | -                       | -             | -                                        | +                         | +                                              | +                                            | +                                          | +                | +                               |
| small bowel                      | -                       | -             | -                                        | +                         | +                                              | +                                            | -                                          | -                | -                               |
| kidney                           | -                       | -             | -                                        | +                         | +                                              | +                                            | -                                          | -                | -                               |
| liver                            | -                       | -             | -                                        | +                         | +                                              | +                                            | -                                          | +                | -                               |
| heart                            | -                       | -             | -                                        | +                         | +                                              | +                                            | -                                          | +                | +                               |
| Haematological malignancy        |                         |               |                                          |                           |                                                |                                              |                                            |                  |                                 |
| acute myeloid<br>leukaemia       | +                       | +             | +                                        | -                         | +                                              | -                                            | +                                          | +                | +                               |
| acute lymphoid<br>leukaemia      | -                       | -             | +                                        | +                         | +                                              | -                                            | +                                          | -                | +                               |
| multiple myeloma                 | -                       | -             | +                                        | -                         | -                                              | -                                            | +                                          | +                | +                               |
| Non-Hodgkin's<br>lymphoma        | -                       | -             | -                                        | +                         | -                                              | -                                            | +                                          | -                | -                               |
| Hodgkin's disease                | -                       | -             | -                                        | +                         | -                                              | -                                            | -                                          | -                | -                               |
| chronic myeloid<br>leukaemia     | -                       | -             | +                                        | -                         | -                                              | -                                            | +                                          | -                | -                               |
| chronic lymphoid<br>leukaemia    | -                       | -             | +                                        | -                         | -                                              | -                                            | +                                          | -                | +                               |
| solid tumour                     | -                       | -             | -                                        | -                         | -                                              | -                                            | -                                          | +                | +                               |
| AIDS                             | -                       | -             | +                                        | -                         | -                                              | -                                            | +                                          | +                | +                               |
| chronic immunological<br>disease | -                       | -             | -                                        | +                         | -                                              | -                                            | -                                          | +                | -                               |

models a low monocyte count is correlated with a poor outcome, especially in allogeneic HSCT patients.<sup>66</sup> In the light of this, it is not surprising that the use of steroids, which can inhibit neutrophil chemotaxis, oxidative bursts and antihyphal activity, is correlated with a substantial negative impact on the prognosis of transplant recipients with IA.<sup>63,65,66</sup>

Other well-established negative prognostic factors, underlined by all authors, are disseminated disease (particularly when CNS involvement is observed) and proven IFD.<sup>62–66</sup> Dissemination of IA is correlated with serious impairment of the immune defence systems, which are obviously unable to control the progression of the life-threatening infection. Some authors have hinted at a possibly unfavourable outcome of IA in patients who have been transplanted with stem cells harvested from peripheral blood compared with bone marrow-derived stem cells, but the mechanism behind this putative difference remains obscure.<sup>64</sup>

In a recent report from the University of Seattle,<sup>65</sup> 405 cases of proven/probable IA in allogeneic HSCT recipients were analysed in order to detect the main prognostic factors for outcome. In general, that study corroborated earlier observations, and renal and liver insufficiency were added as parameters suggestive of a poor outcome. The conclusion of the authors from Seattle has been confirmed by a recent Transplant-Associated Infection Surveillance Network (TRANSNET) study on 415 allogeneic HSCT recipients.<sup>66</sup> Moreover, TRANSNET extended the findings to SOT recipients. Renal insufficiency and liver insufficiency are markers of organ failure and signify that the patient is severely ill; multiple co-morbidities will limit the potential of antifungal therapy.

In allogeneic HSCT recipients, both acute and chronic GvHD are instrumental in the onset of IFD, although they do not seem to have an impact on the outcome of IFD.<sup>62–66</sup> However, when uncontrolled GvHD coincides with IA, the prognosis will be dismal, as suppression of the host defence mechanisms to control GvHD will be inevitable and devastating.<sup>46,65</sup>

Besides HSCT itself, high doses of steroid and proven infection are also regarded as ominous prognostic factors in SOT recipients, while the type of organ transplant, notably liver or lung, and malnutrition play a marginally negative role.<sup>66</sup>

In addition to factors associated with the host immune system, other parameters that refer to clinical practice can influence the outcome of IFD. An appropriate therapeutic approach is correlated with a better prognosis in all patients. Treatment with voriconazole or lipid amphotericin B is correlated with an improved prognosis in all statistical models for the assessment of outcome of IA.<sup>62–66</sup> However, recent studies have hinted at acquired azole resistance by some *Aspergillus fumigatus* isolates. So far, this phenomenon is only an *in vitro* laboratory finding of low prevalence without any clinical counterpart, but, if it were to be accompanied by clinical resistance, its presence would imply a potential adverse prognostic factor.<sup>67</sup> Another decisive factor is treatment delay, i.e. the time that elapses between suspicion of the diagnosis and the initiation of an effective antifungal therapy. The importance of early institution of appropriate therapy has been well demonstrated in a retrospective survey of treatment of patients with zygomycosis.<sup>68</sup> Interestingly, an analysis of 88 immunocompromised patients with IA suggested that the mortality rate was higher among non-neutropenic patients than among neutropenic patients.<sup>69</sup> The authors

hypothesized that this was probably because the non-neutropenic patients may have been monitored for IA less closely than their neutropenic counterparts, and that this, in turn, led to suboptimal management and delayed antifungal therapy. However, it is tempting to speculate that non-neutropenic patients who develop aspergillosis may suffer from severe immunosuppression that is more difficult to diagnose and control, from which recovery might be difficult or impossible.

A recent study evaluated persistently high serum galactomannan levels during antifungal treatment as a predictive index of poor outcome in patients with proven/probable galactomannan-positive IA.<sup>70</sup> The authors concluded that the course of the galactomannan decay is indicative of the eventual outcome, independent of other, more traditional, risk factors for mortality. Some opinion leaders argue that the level of galactomannan could serve as a surrogate endpoint in future antifungal therapeutic trials.

### Prognostic factors for other mould infections

Factors that determine the outcome of infections by other, more obscure, moulds, such as those causing zygomycosis, fusariosis and scedosporiosis, do not differ from the factors in patients with IA (Table 4). Uncontrolled underlying disease, proven zygomycosis, lack of neutrophil recovery, severe lymphopenia, use of steroids and delay in targeted therapy are correlated with a poor prognosis.<sup>68</sup> Another potential adverse prognostic factor is the failure to perform aggressive surgical debridement when possible. Low albumin levels, fungaemia, the need for admission to an ICU and, most of all, persistent neutropenia and use of steroids have been found to be prominent predictors of mortality in patients with fusariosis.<sup>55,56</sup>

In a recent review, all parameters that might influence the outcome of infections due to *Scedosporium* spp. were analysed and produced no surprises. As for all IFDs, uncontrolled malignancy, disseminated disease, lack of recovery from neutropenia and treatment with potent immunosuppressive agents were heralds of a poor prognosis.<sup>71</sup>

## Conclusions

Various cofactors may influence the onset and the outcome of mould infections. In addition to well-defined parameters, such as neutropenia, new factors that need our attention, including genetic predisposition and iron overload, have been added in recent years. Correct identification of the main risk factors for developing an IFD is essential in the evaluation of patients to allow timely institution of appropriate antifungal therapy in this vulnerable group.

## Acknowledgements

The authors thank Professor B. de Pauw for useful suggestions and comments.

## Funding

Authors attended a meeting in Amsterdam to discuss the content for this article, for which they received financial compensation for their time and expenses. No reimbursement was received for drafting or reviewing the

article. Logistical support and assistance with styling and submission of the manuscript was provided by HealthCare21 Communications Ltd and was funded by Pfizer International Operations.

## Transparency declarations

This article is part of a Supplement sponsored by Pfizer Inc.

L. P. has received funds for speaking at symposia organized on behalf of Merck & Co., Astellas, Pfizer and Gilead. He is a member of the Gilead advisory board for Ambisome, and of Merck & Co. for posaconazole and caspofungin. M. A. is a member of the speakers bureau of Pfizer and also received funds for research from Pfizer, Wyeth, Schering Plough, Merck and Gilead. G. D. has received funds for speaking at symposia organized on behalf of Astellas and Pfizer, and has also received funds for research from Gilead and is a member of the Astellas advisory board for micafungin. R. H. has been a consultant for Astellas, Basilea, Gilead, Merck, Pfizer, is a Member of a speakers bureau for Gilead, Merck and Pfizer, and has received a research grant from Pfizer. L. D. has been a consultant for Pfizer, Merck, Schering Plough and Astellas and is a member of the Pfizer Advisory Board for Antifungals. N. B. has no conflict of interest.

## References

- Chamilos G, Luna M, Lewis RE et al. Invasive fungal infections in patients with hematologic malignancies in a tertiary care cancer center: an autopsy study over a 15-year period (1989–2003). *Haematologica* 2006; **91**: 986–9.
- Pagano L, Caira M, Candoni A et al. The epidemiology of fungal infections in patients with hematologic malignancies: the SEIFEM 2004 study. *Haematologica* 2006; **91**: 1068–75.
- Pagano L, Caira M, Nosari A et al. Fungal infections in recipients of hematopoietic stem cell transplants: results of the SEIFEM B-2004 study. *Clin Infect Dis* 2007; **45**: 1161–70.
- Denning DW. Invasive aspergillosis. *Clin Infect Dis* 1998; **26**: 781–803.
- Cornet M, Fleury L, Maslo C et al. Epidemiology of invasive aspergillosis in France: a six-year multicentric survey in the Greater Paris area. *J Hosp Infect* 2002; **51**: 288–96.
- Singh N, Husain S, AST Infectious Diseases Community of Practice. Invasive aspergillosis in solid organ transplant recipients. *Am J Transplant* 2009; **9** Suppl 4: S180–91.
- Singh N, Paterson DL. *Aspergillus* infections in transplant recipients. *Clin Microbiol Rev* 2005; **18**: 44–69.
- Marr KA, Carter RA, Boeckh M et al. Invasive aspergillosis in allogeneic stem cell transplant recipients: changes in epidemiology and risk factors. *Blood* 2002; **100**: 4358–66.
- Lortholary O, Asciglu S, Moreau P et al. Invasive aspergillosis as an opportunistic infection in non-allografted patients with multiple myeloma: a European Organization for Research and Treatment of Cancer/Invasive Fungal Infections Cooperative Group and the Intergroupe Francais du Myelome. *Clin Infect Dis* 2000; **30**: 41–6.
- Mlonakis E, Barlam TF, Flanigan T et al. Pulmonary aspergillosis and invasive disease in AIDS: review of 342 cases. *Chest* 1998; **114**: 251–62.
- Kim HJ, Park YJ, Kim WU et al. Invasive fungal infections in patients with systemic lupus erythematosus: experience from affiliated hospitals of Catholic University of Korea. *Lupus* 2009; **18**: 661–6.
- Mezger M, Einsele H, Loeffler J. Genetic susceptibility to infections with *Aspergillus fumigatus*. *Crit Rev Microbiol* 2010; **36**: 168–77.
- Seo KW, Kim DH, Sohn SK et al. Protective role of interleukin-10 promoter gene polymorphism in the pathogenesis of invasive pulmonary aspergillosis after allogeneic stem cell transplantation. *Bone Marrow Transplant* 2005; **36**: 1089–95.
- Sainz J, Perz E, Hassan L et al. Variable number of tandem repeats of TNF receptor type 2 promoter as genetic biomarker of susceptibility to develop invasive pulmonary aspergillosis. *Hum Immunol* 2007; **68**: 41–50.
- Bochud PY, Chien JW, Marr KA et al. Toll-like receptor 4 polymorphisms and aspergillosis in stem-cell transplantation. *N Engl J Med* 2008; **359**: 1766–77.
- Kesh S, Mensah NY, Peterlongo P et al. TLR1 and TLR6 polymorphisms are associated with susceptibility to invasive aspergillosis after allogeneic stem cell transplantation. *Ann N Y Acad Sci* 2005; **1062**: 95–103.
- Zaas A, Liao G, Chien J et al. Plasminogen alleles influence susceptibility to invasive aspergillosis. *PLoS Genet* 2008; **4**: e1000101.
- Lambourne J, Agranoff D, Herbrecht R et al. Association of mannose-binding lectin deficiency with acute invasive aspergillosis in immunocompromised patients. *Clin Infect Dis* 2009; **49**: 1486–91.
- Brenier-Pinchart MP, Lebeau B, Quesada JL et al. Influence of internal and outdoor factors on filamentous fungal flora in hematology wards. *Am J Infect Control* 2009; **37**: 631–7.
- Panackal AA, Li H, Kontoyiannis DP et al. Geoclimatic influences on invasive aspergillosis after hematopoietic stem cell transplantation. *Clin Infect Dis* 2010; **50**: 1588–97.
- Lass-Flörl C, Eschertzhuber S, Auberger J et al. Airborne fungus—exposure prior hospitalization as risk factor for mould infections in immunocompromised patients. In: *Abstracts of Nineteenth European Congress of Clinical Microbiology and Infectious Diseases (ECCMID); Helsinki, Finland, 2009*. Abstract O243, p. 118. European Society of Clinical Microbiology and Infectious Diseases.
- Terr AI. Sick building syndrome: is mould the cause? *Med Mycol* 2009; **47** Suppl 1: S217–22.
- Weber DJ, Peppercorn A, Miller MB et al. Preventing healthcare-associated *Aspergillus* infections: review of recent CDC/HICPAC recommendations. *Med Mycol* 2009; **47** Suppl 1: S199–209.
- Bénet T, Nicolle MC, Thiebaut A et al. Reduction of invasive aspergillosis incidence among immunocompromised patients after control of environmental exposure. *Clin Infect Dis* 2007; **45**: 682–6.
- Abdul Salam ZH, Karlin RB, Ling ML et al. The impact of portable high-efficiency particulate air filters on the incidence of invasive aspergillosis in a large acute tertiary-care hospital. *Am J Infect Control* 2010; **38**: e1–7.
- Lass-Flörl C, Rath P, Niederwieser D et al. *Aspergillus terreus* infections in haematological malignancies: molecular epidemiology suggests association with in-hospital plants. *J Hosp Infect* 2000; **46**: 31–5.
- Anaissie EJ, Stratton SL, Dignani MC et al. Pathogenic molds (including *Aspergillus* species) in hospital ward distribution systems: a 3-year prospective study and clinical implications for patients with hematologic malignancies. *Blood* 2003; **101**: 2542–6.
- Cunha C, Di Ianni M, Bozza S et al. Dectin-1 Y238X polymorphism associates with susceptibility to invasive aspergillosis in hematopoietic transplantation through impairment of both recipient- and donor-dependent mechanisms of antifungal immunity. *Blood* 2010; doi:10.1182/blood-2010-04-279307.
- Bodey GP. Infectious complications of acute leukemia. *Med Times* 1966; **94**: 1076–85.
- Portugal RD, Garnica M, Nucci M. Index to predict invasive mold infection in high-risk neutropenic patients based on the area over the neutrophil curve. *J Clin Oncol* 2009; **27**: 3849–54.
- Fianchi L, Valentini CG, Posteraro B et al. Functional *in vitro* evaluation of bactericidal and fungicidal activity of neutrophils from patients suffering from myelodysplasia. *Haematologica* 2009; **94**(s4): 195–6.
- Garcia-Vidal C, Upton A, Kirby KA et al. Epidemiology of invasive mold infections in allogeneic stem cell transplant recipients: biological risk factors for infection according to time after transplantation. *Clin Infect Dis* 2008; **47**: 1041–50.



- 33** Palmer LB, Greenberg HE, Schiff M. Corticosteroid treatment as a risk factor for invasive aspergillosis in patients with lung disease. *Thorax* 1991; **46**: 15–20.
- 34** Ng TTC, Robson GD, Denning DW. Hydrocortisone-enhanced growth of *Aspergillus* spp.: implications for pathogenesis. *Microbiology* 1994; **140**: 2475–9.
- 35** Thursky K, Byrnes G, Grigg A *et al.* Risk factors for post-engraftment invasive aspergillosis in allogeneic stem cell transplantation. *Bone Marrow Transplant* 2004; **34**: 115–21.
- 36** Laros-van Gorkom BA, Huisman CA, Wijermans PW *et al.* Experience with alemtuzumab in treatment of chronic lymphocytic leukaemia in the Netherlands. *Neth J Med* 2007; **65**: 333–8.
- 37** Gil L, Kozłowska-Skrzypczak M, Mol A *et al.* Increased risk for invasive aspergillosis in patients with lymphoproliferative diseases after autologous hematopoietic SCT. *Bone Marrow Transplant* 2009; **43**: 121–6.
- 38** Tsiodras S, Samonis G, Boumpas DT *et al.* Fungal infections complicating tumor necrosis factor alpha blockade therapy. *Mayo Clin Proc* 2008; **83**: 181–94.
- 39** Kontoyiannis DP, Chamilos G, Lewis RE *et al.* Increased bone marrow iron stores is an independent risk factor for invasive aspergillosis in patients with high-risk hematologic malignancies and recipients of allogeneic hematopoietic stem cell transplantation. *Cancer* 2007; **110**: 1303–6.
- 40** Altes A, Remacha AF, Sarda P *et al.* Frequent severe liver iron overload after stem cell transplantation and its possible association with invasive aspergillosis. *Bone Marrow Transplant* 2004; **34**: 505–9.
- 41** de Locht M, Boelaert JR, Schneider YJ. Iron uptake from ferrioxamine and from ferrirhizoferrin by germinating spores of *Rhizopus microsporus*. *Biochem Pharmacol* 1994; **47**: 1843–50.
- 42** Ibrahim AS, Spellberg B, Edwards J Jr. Iron acquisition: a novel perspective on mucormycosis pathogenesis and treatment. *Curr Opin Infect Dis* 2008; **21**: 620–5.
- 43** Kontoyiannis DP, Marr KA, Park BJ *et al.* Prospective surveillance for invasive fungal infections in hematopoietic stem cell transplant recipients, 2001–2006: overview of the Transplant-Associated Infection Surveillance Network (TRANSNET) database. *Clin Infect Dis* 2010; **50**: 1091–100.
- 44** Parody R, Martino R, Rovira M *et al.* Severe infections after unrelated donor allogeneic hematopoietic stem cell transplantation in adults: comparison of cord blood transplantation with peripheral blood and bone marrow transplantation. *Biol Blood Marrow Transplant* 2006; **12**: 734–48.
- 45** Miyakoshi S, Kusumi E, Matsumura T *et al.* Invasive fungal infection following reduced-intensity cord blood transplantation for adult patients with hematologic diseases. *Biol Blood Marrow Transplant* 2007; **13**: 771–7.
- 46** Mikulska M, Raiola AM, Bruno B *et al.* Risk factors for invasive aspergillosis and related mortality in recipients of allogeneic SCT from alternative donors: an analysis of 306 patients. *Bone Marrow Transplant* 2009; **44**: 361–70.
- 47** Martino R, Piñana JL, Parody R *et al.* Lower respiratory tract respiratory virus infections increase the risk of invasive aspergillosis after a reduced-intensity allogeneic hematopoietic SCT. *Bone Marrow Transplant* 2009; **44**: 749–56.
- 48** van Burik JA, Carter SL, Freifeld AG *et al.* Higher risk of cytomegalovirus and aspergillus infections in recipients of T cell-depleted unrelated bone marrow: analysis of infectious complications in patients treated with T cell depletion versus immunosuppressive therapy to prevent graft-versus-host disease. *Biol Blood Marrow Transplant* 2007; **13**: 1487–98.
- 49** Fukuda T, Boeckh M, Guthrie KA *et al.* Invasive aspergillosis before allogeneic hematopoietic stem cell transplantation: 10-year experience at a single transplant center. *Biol Blood Marrow Transplant* 2004; **10**: 494–503.
- 50** Gavalda J, Len O, San Juan R *et al.* Risk factors for invasive aspergillosis in solid-organ transplant recipients: a case-control study. *Clin Infect Dis* 2005; **41**: 52–9.
- 51** Pagano L, Valentini CG, Caira M *et al.* Zygomycosis: current approaches to management of patients with hematological malignancies. *Br J Haematol* 2009; **146**: 597–606.
- 52** Kontoyiannis DP, Lionakis MS, Lewis RE *et al.* Zygomycoses in a tertiary-care cancer center in the era of *Aspergillus*-active antifungal therapy: a case-control observational study of 27 recent cases. *J Infect Dis* 2005; **191**: 1350–60.
- 53** Trifilio SM, Bennett CL, Yarnold PR *et al.* Breakthrough zygomycosis after voriconazole administration among patients with hematologic malignancies who receive hematopoietic stem-cell transplants or intensive chemotherapy. *Bone Marrow Transplant* 2007; **39**: 425–9.
- 54** Wingard WR, Carter SL, Walsh TJ *et al.* Results of a randomized, double-blind trial of fluconazole (FLU) vs. voriconazole (VORI) for the prevention of invasive fungal infections (IFI) in 600 allogeneic blood and marrow transplant (BMT) patients. *Blood* 2007; **110**: 163.
- 55** Lionakis MS, Kontoyiannis DP. *Fusarium* infections in critically ill patients. *Semin Respir Crit Care Med* 2004; **25**: 159–69.
- 56** Campo M, Lewis RE, Kontoyiannis DP. Invasive fusariosis in patients with hematologic malignancies at a cancer center: 1998–2009. *J Infect* 2010; **60**: 331–7.
- 57** Husain S, Munoz P, Forrest G *et al.* Infections due to *Scedosporium apiospermum* and *Scedosporium prolificans* in transplant recipients: clinical characteristics and impact of antifungal agent therapy on outcome. *Clin Infect Dis* 2005; **40**: 89–99.
- 58** Meersseman W, Lagrou K, Maertens J *et al.* Invasive aspergillosis in the intensive care unit. *Clin Infect Dis* 2007; **45**: 205–16.
- 59** Guinea J, Torres-Narbona M, Gijón P *et al.* Pulmonary aspergillosis in patients with chronic obstructive pulmonary disease: incidence, risk factors, and outcome. *Clin Microbiol Infect* 2010; **16**: 870–7.
- 60** Antinori S, Nebuloni M, Magni C *et al.* Trends in the postmortem diagnosis of opportunistic invasive fungal infections in patients with AIDS: a retrospective study of 1,630 autopsies performed between 1984 and 2002. *Am J Clin Pathol* 2009; **132**: 221–7.
- 61** Pagano L, Caira M, Candoni A *et al.* Invasive aspergillosis in patients with acute myeloid leukemia: SEIFEM-2008 registry study. *Haematologica* 2010; **95**: 644–50.
- 62** Parody R, Martino R, Sánchez F *et al.* Predicting survival in adults with invasive aspergillosis during therapy for hematological malignancies or after hematopoietic stem cell transplantation: single-center analysis and validation of the Seattle, French, and Strasbourg prognostic indexes. *Am J Hematol* 2009; **84**: 571–8.
- 63** Nivoix Y, Velten M, Letscher-Bru V *et al.* Factors associated with overall and attributable mortality in invasive aspergillosis. *Clin Infect Dis* 2008; **47**: 1176–84.
- 64** Cordonnier C, Ribaud P, Herbrecht R *et al.* Prognostic factors for death due to invasive aspergillosis after hemopoietic stem cell transplantation: a 1-year retrospective study of consecutive patients at French transplantation centers. *Clin Infect Dis* 2006; **42**: 955–63.
- 65** Upton A, Kirby KA, Carpenter P *et al.* Invasive aspergillosis following hematopoietic cell transplantation: outcomes and prognostic factors associated with mortality. *Clin Infect Dis* 2007; **44**: 531–40.
- 66** Baddley JW, Andes DR, Marr KA *et al.* Factors associated with mortality in transplant patients with invasive aspergillosis. *Clin Infect Dis* 2010; **50**: 1559–67.
- 67** Howard SJ, Cerar D, Anderson MJ *et al.* Frequency and evolution of azole resistance in *Aspergillus fumigatus* associated with treatment failure. *Emerg Infect Dis* 2009; **15**: 1068–76.
- 68** Chamilos G, Lewis RE, Kontoyiannis DP. Delaying amphotericin B-based frontline therapy significantly increases mortality among

patients with hematologic malignancy who have zygomycosis. *Clin Infect Dis* 2008; **47**: 503–9.

**69** Cornillet A, Camus C, Nimubona S et al. Comparison of epidemiological, clinical, and biological features of invasive aspergillosis in neutropenic and nonneutropenic patients: a 6-year survey. *Clin Infect Dis* 2006; **43**: 577–84.

**70** Koo S, Bryar JM, Baden LR et al. Prognostic features of galactomannan antigenemia in galactomannan-positive invasive aspergillosis. *J Clin Microbiol* 2010; **48**: 1255–60.

**71** Rodriguez-Tudela JL, Berenguer J, Guarro J et al. Epidemiology and outcome of *Scedosporium prolificans* infection, a review of 162 cases. *Med Mycol* 2009; **47**: 359–70.
